# A transiently expressed connexin is essential for anterior neural plate development in *Ciona intestinalis*

Christopher Hackley<sup>1,\*</sup>, Erin Mulholland<sup>1,\*</sup>, Gil Jung Kim<sup>2</sup>, Erin Newman-Smith<sup>1</sup> and William C. Smith<sup>1,‡</sup>

## SUMMARY

A forward genetic screen in the ascidian *Ciona intestinalis* identified a mutant line (*frimousse*) with a profound disruption in neural plate development. In embryos with the *frimousse* mutation, the anteriormost neural plate cells, which are products of an FGF induction at the blastula and gastrula stages, initially express neural plate-specific genes but fail to maintain the induced state and ultimately default to epidermis. The genetic lesion in the *frimousse* mutant lies within a connexin gene (*cx-11*) that is transiently expressed in the developing neural plate in a temporal window corresponding to the period of a-lineage neural induction. Using a genetically encoded calcium indicator we observed multiple calcium transients throughout the developing neural plate in wild-type embryos, but not in mutant embryos. A series of treatments at the gastrula and neurula stages that block the calcium transients, including gap junction inhibition and calcium depletion, were also found to disrupt the development of the anterior neural plate in a similar way to the *frimousse* mutation. The requirement for *cx-11* for anterior neural fate points to a crucial role for intercellular communication via gap junctions, probably through mediation of Ca<sup>2+</sup> transients, in *Ciona intestinalis* neural induction.

**KEY WORDS:** *Ciona*, Calcium transients, Connexin, Neural induction

## INTRODUCTION

The ascidian larval CNS is a comparatively simple organ. It is composed of only ~330 cells in *Ciona intestinalis* and is organized along the rostral/caudal axis into several morphologically distinct regions: the sensory vesicle, neck, visceral ganglion and caudal nerve cord (Meinertzhagen et al., 2004). The close evolutionary relationship of ascidians to their vertebrate cousins (Delsuc et al., 2006) can be seen in the morphogenesis and anatomy of their respective CNSs. Although a one-to-one correspondence of the anatomical regions of the ascidian CNS to those of vertebrates may not be exact, reflecting their extensive divergence, and is the subject of conflicting interpretation (Dufour et al., 2006), gene expression and anatomical data have equated the sensory vesicle with the vertebrate forebrain, the neck region with the vertebrate midbrain-hindbrain boundary, the visceral ganglion with the hindbrain, and the caudal nerve cord with the vertebrate spinal cord (Meinertzhagen et al., 2004; Imai and Meinertzhagen, 2007).

Unlike in vertebrates, the ascidian CNS develops according to a fixed, and well-described, cell lineage (Nishida, 1987; Cole and Meinertzhagen, 2004). The three primary lineages that contribute to the ascidian CNS trace back to the 8-cell stage. The A-lineage, which gives rise to the posterior sensory vesicle, neck, visceral ganglion and ventral nerve cord, is so-called because it originates from the A4.1 pair of blastomeres. In a similar fashion, the a-lineage descends from the a4.2 blastomeres and gives rise to the anterior sensory vesicle, as well as to two non-neural derivatives of the neural plate, the adhesive palps, which are found at the anterior pole of the larva, and the oral siphon primordium, which is found immediately anterior to the sensory vesicle (Nishida, 1987; Veeman

et al., 2010). The final lineage to contribute to the ascidian CNS, the b-lineage, originates from the b4.2 blastomeres and contributes to the dorsal nerve cord.

The early specification and development of the ascidian CNS have been most extensively studied in the distantly related species *Ciona intestinalis* and *Halocynthia roretzi* (Bertrand et al., 2003; Miya and Nishida, 2003; Meinertzhagen et al., 2004; Wada et al., 2004; Imai et al., 2006; Lemaire et al., 2008). Blastomere isolation experiments in *H. roretzi* have shown that neural specification occurs in isolated A4.1 blastomeres, but not in a4.2 or b4.2 blastomeres, suggesting that the A-lineage arises cell-autonomously, whereas the a- and b-lineages require induction (Nishida, 1991). For the a-lineage, induction by FGF signaling starting in the early cleavage stages has been shown to be crucial in both *C. intestinalis* and *H. roretzi* (Kim and Nishida, 2001; Bertrand et al., 2003; Miya and Nishida, 2003). Induction can be observed as early as the 32- to 64-cell stage by the expression of the transcription factors *otx* and *dmrt1* in the neural precursor cells (Bertrand et al., 2003; Tresser et al., 2010). The source of the a-lineage inducer has been identified in *C. intestinalis* as the vegetally localized FGF9/16/20-producing A4.1 descendants (Bertrand et al., 2003).

The induction of the a-lineage in ascidians is hypothesized to be evolutionarily conserved with vertebrate anterior neural induction (Meinertzhagen et al., 2004). Although both require FGF signaling (Launay et al., 1996; Sasai et al., 1996; Bertrand et al., 2003), BMP inhibitors do not play a role in the ascidian process (Darras and Nishida, 2001). We have previously described a spontaneous mutant line, *frimousse* (*frm*), in *C. intestinalis* in which the development of the a-lineage is profoundly disrupted (Deschet and Smith, 2004). Homozygous *frm* embryos lack palps, the oral siphon precursor and the anterior sensory vesicle, as seen by the absence of pigment cells and Arrestin staining (Fig. 1). Lineage-tracing and expression studies demonstrated that the a-lineage neural plate derivatives in *frm/frm* embryos become misspecified as epidermis after having initially expressed, and subsequently lost, markers of neural specification. The conclusion was that the gene disrupted by the *frm* mutation plays

<sup>1</sup>Department of Molecular, Cellular and Developmental Biology, University of California Santa Barbara, Santa Barbara, CA 93106, USA. <sup>2</sup>Department of Marine Molecular Biotechnology, Gangneung-Wonju National University, 120 Gangneung Daehangno, Gangneung 210-702, Republic of Korea.

\*These authors contributed equally to this work

‡Author for correspondence (w\_smith@lifesci.ucsb.edu)

a role in maintaining neural plate identity in the a-lineage (Deschet and Smith, 2004). Additionally, the a-lineage cells misfated from the sensory vesicle in *frm/frm* embryos remained on the surface of the embryo as a thickened epidermis (Fig. 1B, arrow), rather than neurulating, giving an open rostral neural tube phenotype, whereas the rostral A-lineage components of the CNS, including the posterior sensory vesicle and visceral ganglion, appeared to be intact in *frm/frm* embryos (Fig. 1C,D, CRALBP staining). We report here that the causative mutation in the *frm* line lies within a connexin gene that is transiently expressed in the neural plate.

## MATERIALS AND METHODS

### SNP and INDEL mapping

The *frm* mutation was mapped using SNP markers, as described previously (Veeman et al., 2011). The first round of linkage analysis used primers designed at two loci equidistant along each of the 14 chromosome arms of *C. intestinalis*, with the exception of chromosome arms (4p, 5p and 6p) containing rDNA. Finer resolution mapping was then achieved using either pooled genomic DNA or genomic DNA from single larvae with region-specific primers. Recombination was quantified either by measuring peak heights from sequencing traces for SNPs (Veeman et al., 2011) or by gel electrophoresis on a 3.5% agarose gel using a 50:50 mixture of standard molecular grade agarose and MetaPhor agarose (Cambrex Bio Science, Rockland, ME, USA).

PCR products spaced within the linked region were analyzed for the presence of INDELs differing between wild-type and *frm/frm* embryos. Single tadpoles were sorted and placed in individual wells of a 96-well plate. Genomic DNA was extracted as described (Veeman et al., 2011) and then PCR amplified for the INDEL-containing region. PCR products were then analyzed by gel electrophoresis as above.

### RT-PCR

Heterozygous *frm* adults were spawned to generate pools of 150 phenotypically wild-type (wt/wt and wt/*frm*) and phenotypically mutant (*frm/frm*) larvae. RNA isolation was performed using Trizol (Invitrogen) followed by phenol/chloroform extraction and ethanol precipitation. cDNA was prepared using the Advantage RT for PCR Kit (Clontech). Primer sequences for RT-PCR of *cx-11* were 5'-CGATACTAAAAACCCCAAGC-3' and 5'-GGCATCTTCGTCACCTTCTT-3'.

### Whole-mount embryo staining

Immunostaining for Arrestin and cellular retinaldehyde-binding protein (CRALBP) (Tsuda et al., 2003; Tresser et al., 2010), Bodipy-FL phalloidin staining and embryo imaging (Veeman et al., 2010) and fluorescent *in situ* hybridizations (Christiaen et al., 2009b) were performed as described previously. For *cx-11*, 1211 bp digoxigenin-labeled sense and antisense probes were prepared from the full-length cDNA. Colorimetric *in situ* staining was performed on embryos as previously described (Christiaen et al., 2009b), except that after tyramide amplification and washes the embryos were incubated with a 1:1000 dilution of anti-fluorescein AP-conjugated antibody (Perkin-Elmer) in PBST (PBS with 0.1% Tween 20) for 1 hour at room temperature then at 4°C overnight. Embryos were then washed five times in PBST and stained with NBT/BCIP.

### Gene knockdown/inhibition

*Cx-11* was knocked down using a 1:1 mixture of translation-blocking and splice-blocking morpholinos (MOs): *cx-11* translational block, 5'-ATATGTTCCACATCGTGAATATGT-3'; *cx-11* splice block, 5'-TCTCGTGTGGAAGAAAGATAAGTA-3'. MO injections were performed as described previously (Yamada et al., 2003). Control embryos received the MO 5'-CCTCTTACCTCAGTTACAATTTATA-3'.

RT-PCR with cDNA from MO-injected embryos was performed with primers: *HO9*, 5'-ATGTAAACCACTCCCCGTGA-3' and 5'-GCACCTTGAATGCAAACAGG-3'; *six3/6*, 5'-GCTCTGTCTCGTTCCTTCT-3' and 5'-CAATTGTTGCGTTTACCAG-3'; *SP-8*, 5'-CAATTGTTGCGTTTACCAG-3' and 5'-ACGTAGGGTGACGAACCTGG-3'; and *actin*, 5'-GTGCTTTCATGGTACGCTTCT-3' and 5'-CGGCGATTCCAGGGAACATAG-3'.

### Embryo treatments

#### β-glycylrrhethinic acid treatment

β-glycylrrhethinic acid was dissolved in DMSO to make a 1000× stock solution, and then added to dechorionated embryos at a final concentration of 100 μM. Control embryos received DMSO only. After treatment (2–3 hours at 18°C, depending on protocol) the embryos were transferred through several Petri dishes of sea water to wash out the drugs. Treated embryos were cultured at 13°C or 15°C to hatching stage, at which point they were fixed and assessed for developmental defects.

#### Low Ca<sup>2+</sup> treatment

Fertilized, dechorionated embryos were grown in filtered natural sea water with 2.5 μg/ml each streptomycin and kanamycin until early gastrula stage at 18°C. Embryos were transferred into artificial sea water (ASW) with either 11 mM (regular) or 0.5 mM (low) CaCl<sub>2</sub>. Embryos were grown until initial tailbud stage (~3.5 hours), at which time the 0.5 mM Ca<sup>2+</sup>-treated embryos were transferred through three washes with 11 mM Ca<sup>2+</sup> ASW. Embryos were then grown to late tailbud stage to assess phenotype.

### Transgenic constructs

*etr1p::GCaMP5* was constructed using the Gateway system (Invitrogen). GCaMP5 (gift of J. Akerboom) (Akerboom et al., 2012) was amplified with primers 5'-GGGGACAAGTTTGTACAAAAAAGCAGGCTCAG-AAAAATGGGTTCTCATCATCATCA-3' and 5'-GGGGACACTTTGTACAAAGAAAGCTGGGTTTATCACTTCGCTGTCTCATCATTTGTAC-3'. This was then recombined into pDONR 221 (Invitrogen) and the resultant entry vector (L1/GCaMP-5/L2) was recombined using LR Clonase (Invitrogen) with L3/*etr1p*/L5 into destination vector pSP1.72BSSPE-R3-R5-RFA (Roure et al., 2007). Fertilized, dechorionated embryos were then electroporated (Christiaen et al., 2009a) with 50 μg *etr1p::GCaMP-5* and imaged for 2.5–4 minutes on a Leica DMI6000B inverted microscope with a Hamamatsu ImageEM C9100-13 electron multiplier charge-coupled device (EM-CCD) camera at 31 frames per second. Calcium transient movies were created using QuickTime Pro (Apple). To calculate relative fluorescence, cells in digital images were manually outlined and quantified using ImageJ (Abramoff et al., 2004).

For *Cx-11p::Cx-11-H2B::GFP*, primers 5'-TTTCGACGCGGTATGTGCTTCTGTGG-3' and 5'-CGGAGCACTCGGAAACAGAATATGTG-3' were used to PCR amplify a 3.75 kb genomic fragment containing the two *cx-11* exons and intervening intron, and 2.1 kb of upstream sequence from the predicted start ATG. The PCR product was cloned into the PCR8/GW/TOPO TA vector and recombined with RFA-H2B::GFP to generate a C-terminal nuclear-localized GFP fusion protein (Roure et al., 2007).

*etr1p::Otx<sub>HD</sub>::enR* was created using the Gateway system by first amplifying *Otx<sub>HD</sub>::enR* from pSix3:*Otx<sub>HD</sub>::enR* (Haeussler et al., 2010) using primers 5'-GGGGACAAGTTTGTACAAAAAAGCAGGCTCA-GAAAAAATGGTATACAGTTCGTCTAG-3' and 5'-GGGGACCACTTTGTACAAAGAAAGCTGGGTAATTCTATACGTTTCAGGTCCT-3' with *att* B1/*att* B2-kozac feet attached. The resulting PCR product was then BP cloned into pDONR 221 to create an L1/*Otx<sub>HD</sub>::enR*/L2 entry vector. This entry vector was then recombined using LR Clonase with L3/*etr1p*/L5 into the destination vector pSP1.72BSSPE-R3-R5-RFA (Roure et al., 2007); the construct was electroporated as above.

## RESULTS

### The *frimousse* mutation disrupts a connexin gene

We mapped the *frm* mutation using pooled genomic samples from *frm/frm* and wild-type larvae with a set of single-nucleotide polymorphism (SNP) markers distributed along the *C. intestinalis* chromosomes (Veeman et al., 2011). An initial round of mapping linked the mutant locus to the 8.06 Mb chromosome arm 2q (Fig. 1E). Finer analysis of SNP markers in pooled samples showed strongest linkage between 0.5 Mb and 3.5 Mb on 2q (supplementary material Fig. S1A). Higher resolution mapping required analysis of genomic DNA from single *frm/frm* larvae for recombination in this region. Several hundred *frm/frm* larvae were

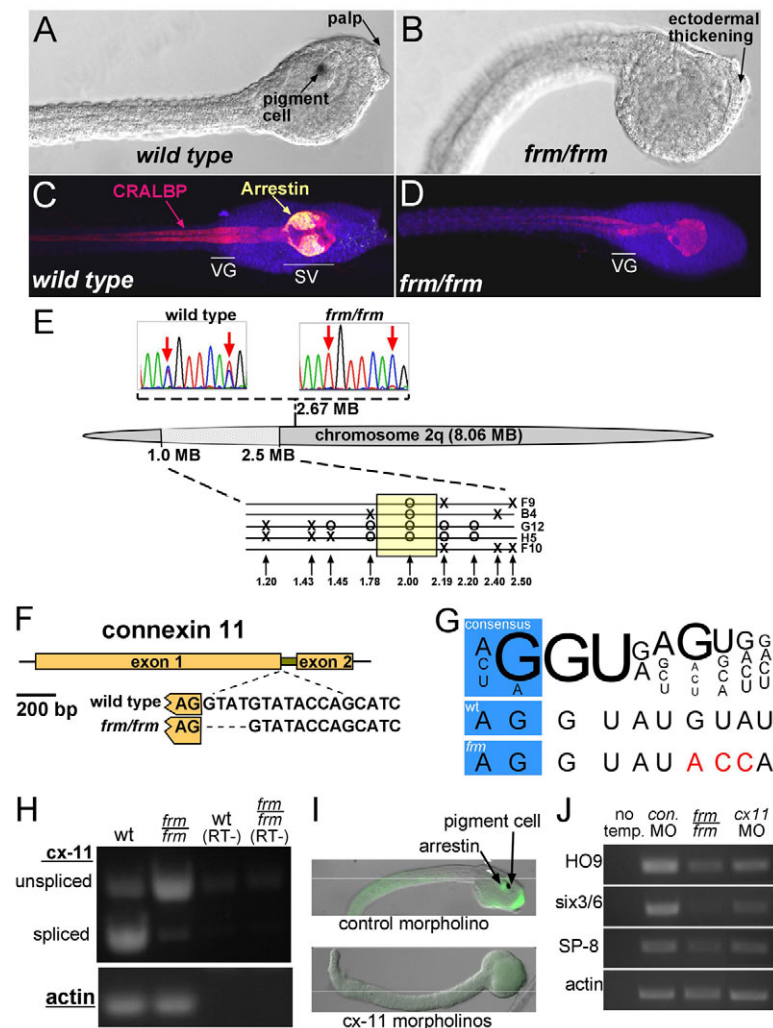

**Fig. 1. Characterization of the *frmousse* mutation.**

(A,B) Wild-type (A) and *frm/frm* (B) late tailbud stage *Ciona intestinalis* embryos. (C,D) Wild-type (C) and *frm/frm* (D) larvae immunostained for CRALBP (pan-CNS) and Arrestin (sensory vesicle). VG, visceral ganglion; SV, sensory vesicle. (E) Mapping of the *frm* mutation on chromosome 2q. Sequence traces (top) show linkage by SNP mapping to position 2.67 Mb. Finer mapping in the region 1.0 to 2.5 Mb with INDEL markers is shown (bottom). Single recombinant *frm/frm* tadpoles are indicated (F9, B4, G12, H5, F10). Circles indicate where only the linked INDEL allele was observed, and X indicates where a recombination resulted in both INDEL alleles being present. (F) The *C. intestinalis connexin-like 11* (*cx-11*) gene, which in *frm* embryos contains a 4 bp deletion at the 5' splice site of the single intron. (G) Comparison of the *cx-11* 5' splice site in wild type (wt) and in the *frm* allele with the consensus sequence (Wang and Burge, 2008). Variation from consensus are indicated in red. (H) RT-PCR for *cx-11* using intron-spanning primers. Splicing is greatly reduced in cDNA from *frm/frm* embryos. RT-, controls without reverse transcriptase. (I) Injection of morpholinos (MOs) to *cx-11* phenocopies the *frm* phenotype. (J) RT-PCR for three anterior neural plate-expressed genes (*HO9*, brain; *six3/6*, oral siphon primordium; *SP-8*, palp) and *actin* (loading control) in embryos injected with control MO or *cx-11* MOs and in homozygous *frm* embryos (*frm/frm*). No temp., no template control.

first screened using an INDEL marker for recombination in this genomic region. Linkage analyses with five selected recombinant larvae using a set of nine INDEL markers in the region 1.20 to 2.50 Mb are shown in Fig. 1E. This final linkage analysis was able to narrow down the linked region to a genomic segment of ~0.41 Mb (Fig. 1E, yellow box).

A combination of quantitative RT-PCR and sequencing was then used to narrow down the ~40 predicted genes in this region. Our previous mutation-mapping projects in *Ciona* have shown that transcript downregulation is a good predictor of mutant genes (Jiang et al., 2005; Veeman et al., 2008; Chiba et al., 2009; Tresser et al., 2010). One transcript in particular within the region showed strong downregulation: a predicted connexin gene annotated as *connexin like-11* (*cx-11*) (supplementary material Fig. S1B). *C. intestinalis cx-11* is a predicted two-exon gene with a short intron (Fig. 1F). Comparison of the nucleotide sequence of the *cx-11* genes from *frm/frm* and wild-type genomic DNAs identified a 4 bp deletion in the *frm/frm* gene at the boundary between the first exon and the intron (Fig. 1F). Although the deletion did not result in the most highly conserved nucleotides at the splice junction being altered, several bases downstream from the junction were altered from the consensus (Fig. 1G). An analysis was performed on the wild-type and mutated splice sites using SplicePort, which calculates the probability of splice junctions (Dogan et al., 2007). When the wild-type *cx-11* genomic sequence was analyzed, the

strongest predicted candidate sequences for splice donor and acceptor sites were those indicated in Fig. 1F. Both sites scored a value of over +1.4, which the algorithm gives as the lowest false-positive rate (FPR) and highest probability. However, when the analysis was run to include the 4 bp deletion in the *frm/frm* sequence, the splice donor site, which had previously scored over +1.4, now scored -0.22, significantly decreasing probability and increasing the FPR.

In order to directly assess whether these changes would disrupt *cx-11* splicing, PCR primers spanning the intron were used to amplify cDNA from *frm/frm* and wild-type embryos. Although the *cx-11* transcript was downregulated in *frm/frm* embryos (supplementary material Fig. S1B), we were able to detect transcript by increasing the number of PCR cycles (Fig. 1H). The amount of properly spliced *cx-11* transcript was dramatically reduced in cDNA samples from *frm/frm* embryos in comparison to cDNA from wild-type embryos, indicating that the 4 bp deletion detected in the mutant *cx-11* allele was sufficient to greatly reduce splicing at this site. Unsliced transcript contains a premature stop codon following exon 1.

The strong genetic linkage, downregulation and splicing defect in the mutant allele of *cx-11* made it a strong candidate for the mutation causing the *frm* phenotype. Final support was obtained when it was observed that injection of mixed splice-blocking and translation-blocking *cx-11* morpholino antisense oligonucleotides



(*cx-11* MOs) into wild-type embryos phenocopied the *frm* phenotype in 16 of 18 *cx-11* MO-injected embryos scored. The *cx-11* MO-injected embryos showed reduced or absent palps, pigment cells and Arrestin staining (Fig. 1I). RT-PCR was performed on pooled cDNA from six *cx-11* MO-injected and six control MO-injected embryos. The *cx-11* MO-injected embryos showed knockdown of the brain marker *HO9*, the oral siphon primordium marker *six3/6* and the palp marker *SP-8* comparable to that in *frm/frm* embryos (Fig. 1J).

### *cx-11* is transiently expressed in neural precursor cells

The temporal expression of *cx-11* was examined by RT-PCR in staged cDNA samples (Fig. 2A) [see Hotta et al. (Hotta et al., 2007) for *C. intestinalis* staging]. A low level of maternal transcript was found in eggs and appears to persist through early cleavage stages. Much stronger expression of *cx-11* was observed starting at the 32-cell stage and persisted through neurula stages. At the neurula stage, transcript levels were already declining, and by early tailbud stage the transcript level was greatly reduced. Thus, elevation of *cx-11* expression is observed in a very narrow temporal window corresponding to the period of a-lineage neural induction in *C. intestinalis*.

The spatial expression of *cx-11* was examined by fluorescent whole-mount *in situ* hybridization in embryos at the peak stages of *cx-11* expression (32-cell to neurula). At all stages examined, specific hybridization was observed in both the neural and muscle precursor cells. At the 32-cell stage (Fig. 2B,C), *cx-11* expression was strongest in the B6.2 and B6.4 primary muscle precursor cells, but weak expression was observed in the A6.2 and A6.4 cells, which are the precursors of both the CNS A-lineage and primary notochord cells (Minokawa et al., 2001). At the next round of division of the A6.2 and A6.4 cells, the notochord and CNS fates segregate (44-cell stage). We were unable to detect expression of *cx-11* at this stage in the a-lineage, although we could not rule out a very low level of expression. No specific hybridization was observed with a control sense probe (supplementary material Fig.

S2). At the initial gastrula (112-cell) stage, expression of *cx-11* was observed in the CNS a-lineage, as well as in the eight A-lineage neural precursor cells, including the A8.16 cells, which at this stage are fated to give rise to both lateral caudal nerve cord and secondary muscle cells (Fig. 2D-F) (Hudson and Yasuo, 2008). Expression was also observed in the primary muscle lineage (Fig. 2F, light blue cells) and in the b8.17 cells (dark blue), which give rise to both the b-lineage of the CNS and to secondary muscle cells. Expression of *cx-11* was already declining by the neural plate stage (Fig. 2A), making the hybridization signals difficult to detect, although faint *cx-11* expression could be detected in the neural plate in both the A- and a-lineages (Fig. 2G,H), with the strongest hybridization seen in the presumptive posterior muscles.

*Cx-11* expression was also investigated using a transiently expressed transgenic construct (*Cx-11p::Cx-11-H2B::GFP*) that encodes a nuclear-localized GFP fused at the end of the second *cx-11* exon driven by 2.1 kb of 5' upstream genomic sequence. Because of the perdurance of GFP we were able to detect *cx-11*/nuclear-GFP fusion-expressing cells at the tailbud stage (Fig. 2I). Consistent with the *in situ* results, we observed GFP-labeled nuclei throughout the CNS, as well as the atrial siphon primordium, palps and posterior muscle.

### Gap junction inhibition mimics the *frm* phenotype

The genetic, expression and MO knockdown data all point to a mutation in *cx-11* as being the cause of the *frm* phenotype. To further investigate a possible role for gap junctions in the development of the *C. intestinalis* CNS, embryos were treated with  $\beta$ -glycyrrhetic acid ( $\beta$ GA), a widely used gap junction channel blocker with broad specificity (Juszczak and Swiergiel, 2009). In a preliminary experiment to determine the efficacy and reversibility of gap junction blockage by  $\beta$ GA, swimming *C. intestinalis* larvae were soaked in 100  $\mu$ M  $\beta$ GA. Within 5 minutes of  $\beta$ GA addition, larvae stopped swimming, presumably due to inhibition of the spread of excitation by gap junctions between muscle cells (Bone, 1992; Horie et al., 2010). Transferring the  $\beta$ GA-treated larvae back

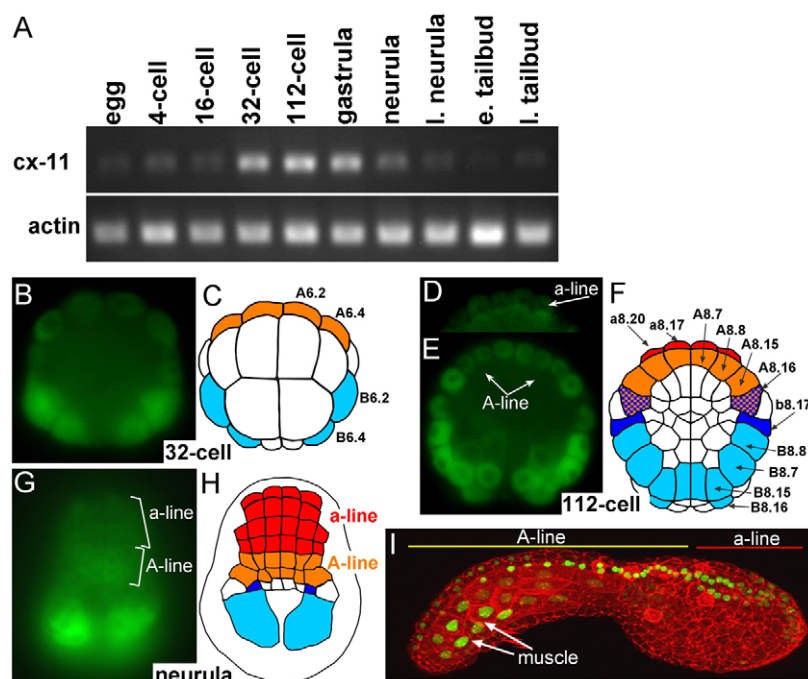

**Fig. 2. *Cx-11* expression during *C. intestinalis* development.** (A) RT-PCR for *cx-11* and *actin* (control) at various stages from egg to late tailbud. I. neurula, late neurula; e. tailbud, early tailbud; I. tailbud, late tailbud. (B-H) *Cx-11* expression in embryos at the 32-cell (B,C), 112-cell (D-F) and neurula (G,H) stages as detected by fluorescent *in situ* hybridization. In the diagrams, *cx-11*-expressing cells are colored: orange, A-lineage; red, a-lineage; dark blue, secondary muscle cells; light blue, primary muscle cells. (I) Expression of a *cx-11*/nuclear-GFP fusion protein (green) driven by a 2.1 kb genomic region 5' of the predicted *cx-11* translation start. Embryos were also stained with phalloidin (red) to outline cells. Image shows a three-dimensional reconstruction from a laser-scanning confocal microscope.

to plain sea water gradually restored normal swimming over a period of 15–30 minutes.

The ease with which  $\beta$ GA could be added to, and washed out from, the embryos allowed us to precisely determine if, and when, there was a requirement for gap junction communication in *C. intestinalis* CNS development. In these experiments, *C. intestinalis* embryos were treated with  $\beta$ GA for either 2 or 3 hours starting at various time points, the earliest being mid-gastrulation (Fig. 3A). The embryos were scored for regional morphological markers including palps, pigment cells, and neural tube closure, and were immunostained for both CRALBP and Arrestin (Tsuda et al., 2003) (see Fig. 1C,D). Addition of  $\beta$ GA at the 32-cell stage resulted in grossly abnormal embryos that failed to gastrulate and could not be scored. The defects from  $\beta$ GA treatments starting at the gastrula stage were much more discrete. Two-hour  $\beta$ GA treatments starting at mid-gastrula, late gastrula or mid-neurula stages (treatments 1, 2 and 3; Fig. 3A) were all effective at preventing the appearance of the palps as assessed at late tailbud stage (palps were identified on only 27%, 16% and 15% of embryos, respectively), whereas the majority of embryos treated for 2 hours at either late neurula or tailbud stages (treatments 4 and 5; Fig. 3A) had palps (58% and 87%, respectively). Three-hour  $\beta$ GA treatments starting either at mid- or late gastrula were even more effective at blocking the development of the palps. The induction of the sensory vesicle was assessed by Arrestin staining. Two-hour  $\beta$ GA treatment resulted in 48% of the embryos having greatly reduced Arrestin staining and 17% completely lacked Arrestin staining (Fig. 3A,B). Three-hour  $\beta$ GA treatment increased these percentages to 53% and 42%, respectively. Consistent with the timing of induction of pigment cells (Nishida, 1991), we observed that later (from late gastrula) and longer (3-hour)  $\beta$ GA treatment was required to block pigment cell induction. Of these embryos, 47% had weak pigment expression and 21% had no detectable pigment. Finally, the 3-hour  $\beta$ GA treatment was effective in generating an open brain phenotype at percentages similar to those seen in *frm* embryos.

In summary,  $\beta$ GA establishes a crucial role for gap junctions in the development of anterior neural plate derivatives in *C. intestinalis*. Moreover, it identifies different sensitivity periods for palp, pigment cell and sensory vesicle induction. The defects caused by  $\beta$ GA treatment appeared to be confined to the a-lineage; the A-lineage was largely normal, as seen by the persistence of CRALBP staining in the posterior sensory vesicle and visceral ganglion.

### Calcium transients in the *Ciona* neural plate

Having identified a *cx-11* mutation as the cause of the *frm* phenotype, we investigated possible mechanisms of action for gap junctions in *C. intestinalis* CNS development. Studies in *Xenopus* have shown an essential role for  $\text{Ca}^{2+}$  transients in neural induction (Leclerc et al., 2000; Leclerc et al., 2006; Moreau et al., 2008), and, although gap junction communication has not been shown to be involved in  $\text{Ca}^{2+}$  transients in the *Xenopus* neural plate, in other contexts gap junctions are essential for  $\text{Ca}^{2+}$  transients (Orellana et al., 2012). To investigate the presence of  $\text{Ca}^{2+}$  transients in the *C. intestinalis* neural plate, we transiently expressed a transgene containing the fluorescent  $\text{Ca}^{2+}$  reporter protein GCaMP5 (Akerboom et al., 2012) using the cis-regulatory region from the pan-neural gene *etr1* (*etr1p::GCaMP5*) (Yagi and Makabe, 2001; Tresser et al., 2010). The transient expression method in *Ciona*, which involves electroporating hundreds of embryos at a time, gives variable levels of expression, and  $\text{Ca}^{2+}$  transients could typically be seen in half or fewer of the electroporated embryos.

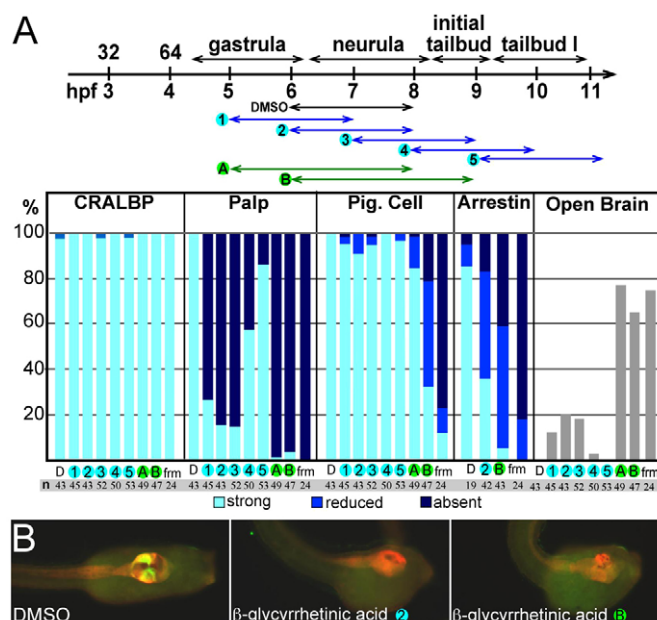

**Fig. 3.  $\beta$ -glycyrrhetic acid disrupts CNS development.** (A)  $\beta$ -glycyrrhetic acid ( $\beta$ GA) disrupts CNS development. At the top is a timecourse of embryo treatments with  $\beta$ GA (or DMSO as control). Blue arrows indicate 2-hour treatments and green arrows indicate 3-hour treatments. The treated embryos (and *frm/frm* embryos) were scored for both morphological defects (disruption of palps and open brains) and molecular markers [pigment (pig.) cells (melanin) and immunostaining for CRALBP and Arrestin]. The column labels at the bottom of the bar chart correspond to numbers/letters in the timecourse and indicate number of embryos examined (*n*). hpf, hours post-fertilization; D, DMSO control; frm, *frm/frm* embryo. (B) Representative control (DMSO) and  $\beta$ GA-treated embryos from two different treatment courses. Embryos are immunostained for CRALBP (red) and Arrestin (green/yellow).

Additionally, we could not image embryos for  $\text{Ca}^{2+}$  transients longer than  $\sim 5$  minutes without severely damaging the embryos. Expression of the transgene was detectable as early as the late gastrula stage, when sporadic  $\text{Ca}^{2+}$  transients were seen in the neural plate (Fig. 4A; supplementary material Movie 1). By mid-neurula stage the  $\text{Ca}^{2+}$  transients were much more abundant and moved between clusters of adjacent cells throughout the a- and A-lineages of the neural plate (Fig. 4B; supplementary material Movie 2). The *etr1* promoter also drives expression in a subset of muscle cells (Veeman et al., 2010) and in supplementary material Movie 2 a muscle transient can also be seen. Fig. 4C shows the relative fluorescence intensity in seven cells in one embryo [one cell being a non-transgenic negative control (cell 1)] over a 90-second interval. All of the measured cells showed one or two  $\text{Ca}^{2+}$  transients during this period, each of  $\sim 10$  seconds in duration (with the exception of the negative control cell).

In order to assess whether the *frm* mutation disrupts  $\text{Ca}^{2+}$  transients in the neural plate, one-cell stage embryos from heterozygous *frm* parents were electroporated with *etr1p::GCaMP5*. The GCaMP5 reporter was expressed at much lower levels in the a-lineage of the homozygous *frm* mutants (*frm/frm*) because in the mutant these cells are transfected to epidermis (Fig. 5A), thus restricting our analysis to the A-lineage. The lower level of GCaMP5 expression in the a-lineage did,

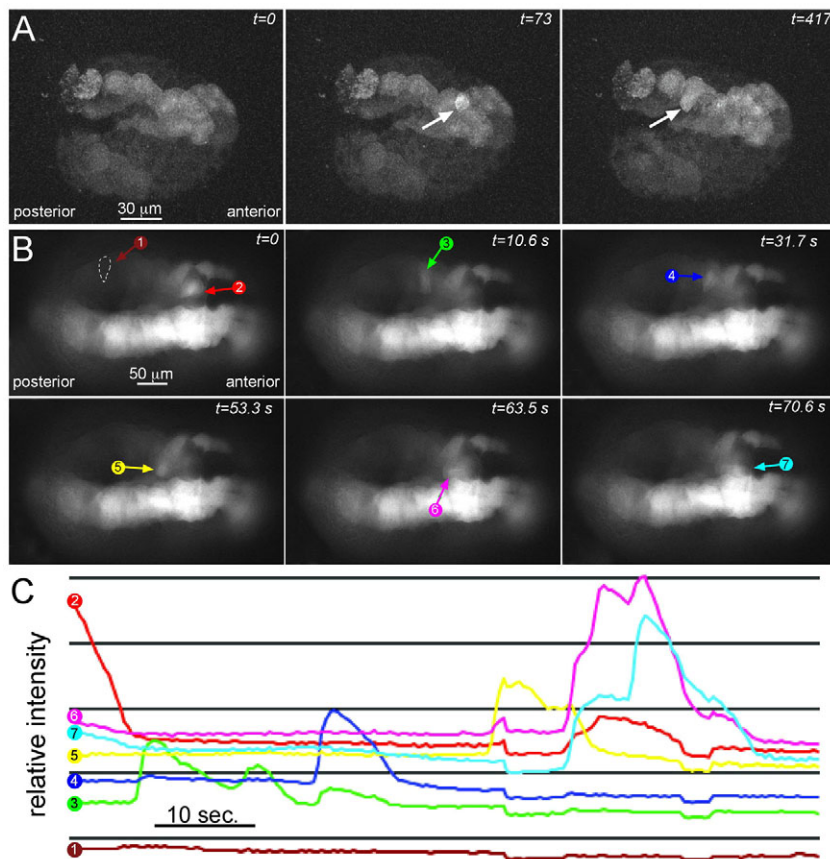

**Fig. 4.  $\text{Ca}^{2+}$  transients in the neural plate.**

(A)  $\text{Ca}^{2+}$  transients (arrow) in a late gastrula stage embryo expressing the fluorescent  $\text{Ca}^{2+}$  indicator GCaMP5 in the neural plate. Selected frames covering 417 seconds of a time-lapse movie are shown. (B)  $\text{Ca}^{2+}$  transients at mid-neurula stage. Colored arrows indicate a wave of  $\text{Ca}^{2+}$  transients moving between adjacent cells (cells 2-7; cell 1 is a non-transgenic control). (C) Relative fluorescence intensities of the cells indicated in B plotted versus time.

however, allow us to easily identify the *frm/frm* mutants, which constitute only 25% of the embryos. Embryos from several parents used in independent electroporations were imaged at the neurula stage. The percentage of electroporated embryos showing  $\text{Ca}^{2+}$  transients in the A-lineage during ~3-minute imaging sessions is presented in Fig. 5B.  $\text{Ca}^{2+}$  transients were observed in 32% ( $n=34$ ) of phenotypically wild-type embryos (which included heterozygous

*frm* embryos). By contrast, only one *frm/frm* embryo out of 15 recorded (7%) was observed to have a single weak  $\text{Ca}^{2+}$  transient [*frm(pos)*, Fig. 5A].

We observed that addition of the gap junction channel blocker  $\beta$ GA could phenocopy the *frm* mutation (Fig. 3). We further observed that addition of 100  $\mu\text{M}$   $\beta$ GA to neurula stage embryos expressing *etrlp::GCaMP5* eliminated  $\text{Ca}^{2+}$  transients (Fig. 5C).

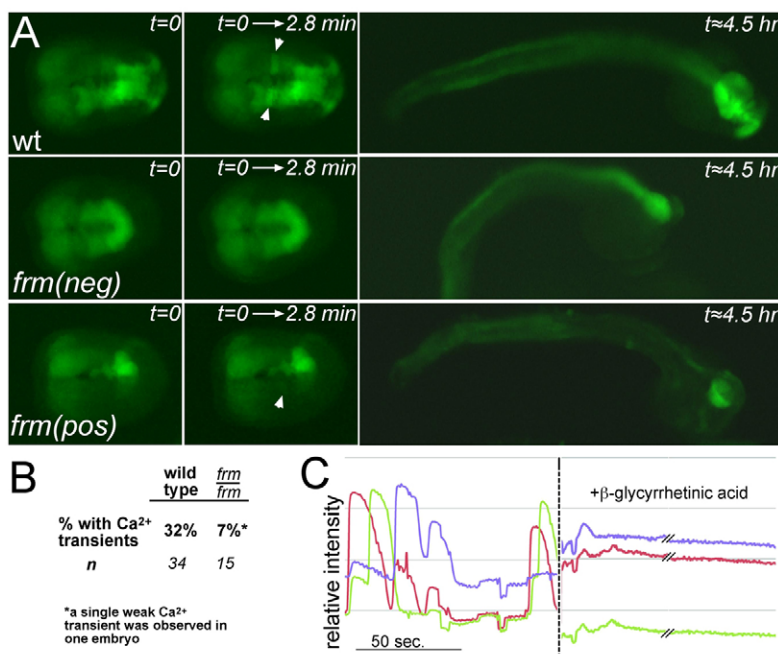

**Fig. 5. *frm* mutation disrupts  $\text{Ca}^{2+}$  transients.** (A) Time-lapse recordings of  $\text{Ca}^{2+}$  transients in wild-type (wt) and homozygous *frm* embryos expressing GCaMP5 in the neural plate. The first column shows neurula stage embryos at the beginning of the time-lapse. *frm(neg)* is an example of an embryo showing no  $\text{Ca}^{2+}$  transients, whereas the single *frm* embryo showing a weak  $\text{Ca}^{2+}$  transient is labeled *frm(pos)*. The second column shows a temporal projection of images collected for 2.8 minutes.  $\text{Ca}^{2+}$  transients are indicated by arrowheads. The final column shows the same embryos at the tailbud stage. Homozygous *frm* embryos are confirmed by reduced expression of GCaMP5 in the anterior CNS. (B) Percentage of wild-type and homozygous *frm* embryos showing  $\text{Ca}^{2+}$  transients. (C) Addition of  $\beta$ GA eliminates  $\text{Ca}^{2+}$  transients. Relative intensities of three cells before and after addition of  $\beta$ GA (at dashed line). The dashed line itself corresponds to a ~3-minute interval in which  $\beta$ GA was added and mixed.



Fig. 5C shows the relative fluorescence intensities in three cells before and ~5 minutes after the addition of  $\beta$ GA. There was a complete absence of  $\text{Ca}^{2+}$  transients throughout the neural plate after the addition of  $\beta$ GA (supplementary material Movie 3).

As an additional test for the function of the  $\text{Ca}^{2+}$  transients, embryos were partially depleted of  $\text{Ca}^{2+}$  by incubation in low  $\text{Ca}^{2+}$  (0.5 mM versus 11 mM  $\text{Ca}^{2+}$  for control embryos) artificial sea water (ASW) starting at late gastrulation. The low  $\text{Ca}^{2+}$  ASW completely eliminated  $\text{Ca}^{2+}$  transients, whereas re-addition of  $\text{Ca}^{2+}$  to 11 mM quickly resulted in prolonged  $\text{Ca}^{2+}$  transients (Fig. 6A). To phenotypically assess the effects of  $\text{Ca}^{2+}$  depletion on development, embryos were exposed to low  $\text{Ca}^{2+}$  ASW for a 3-hour period starting at late gastrula stage and extending through the initial tailbud stage, and then returned to natural sea water and cultured to the late tailbud stage. Embryos were assessed for the presence of pigment cells, palps and neural tube closure, and were immunostained for CRALBP and Arrestin. Defects in the low  $\text{Ca}^{2+}$ -treated embryos appeared to be highly specific (e.g. there were no observable defects in gastrulation, tailbud elongation or caudal neural tube closure). The most conspicuous defects were the absence of palps and pigment cells in the majority of the low  $\text{Ca}^{2+}$ -treated embryos (Fig. 6D). Additionally, approximately half (45%) of the low  $\text{Ca}^{2+}$ -treated embryos had open rostral neural tubes. Immunostaining showed that the majority of the low  $\text{Ca}^{2+}$ -treated embryos had no, or greatly reduced, Arrestin staining, whereas CRALBP staining remained at, or near, control levels in all embryos (Fig. 6B,C). In summary, the defects arising from the low  $\text{Ca}^{2+}$  treatment starting at the late gastrula stage appeared to be primarily in the a-lineage of the CNS, whereas caudal portions of the CNS, as assessed by CRALBP staining, appeared largely intact.

## DISCUSSION

The *frm* mutation results in severe disruption of the development of the anterior (a-lineage) neural plate derivatives in *C. intestinalis* (Deschet and Smith, 2004). In the present study we have shown that a genetic lesion in a connexin gene (*cx-11*) is responsible for the *frm* phenotype. Connexin proteins are best known for their role in forming gap junctions, which join the cytoplasm of adjacent cells, although connexins also form hemichannels, which can function as channels to the extracellular fluid (Bruzzone and Dermietzel, 2006; Mese et al., 2007). The mapping studies presented here show a tight genetic linkage to a *cx-11* allele that carries a splice-disrupting mutation that results in the incorporation of a premature stop codon. Additionally, the *frm* mutation is closely phenocopied by injection of translation-blocking and splice-blocking MOs and by the addition of a broad specificity gap junction inhibitor during restricted temporal windows of CNS development.

It is difficult to assign an exact vertebrate ortholog to the *C. intestinalis* *cx-11* gene. Ascidians, such as *C. intestinalis*, are tunicates, which together with the vertebrates and cephalochordates comprise the chordates. Connexin genes are found only in vertebrates and tunicates and in no other living group; even the cephalochordates lack connexin genes (Shestopalov and Panchin, 2008). Seventeen connexin-like genes have been annotated for the *C. intestinalis* genome (Okamura et al., 2005), although our analysis of these sequences suggests that the correct number is fifteen. Phylogenetic analyses of chordate connexin genes usually result in the tunicate genes clustering together, reflecting their extensive divergence from the vertebrate connexin genes (Abascal and Zardoya, 2012). One interpretation of this result is that the last common ancestor of the vertebrates and tunicates had only a single

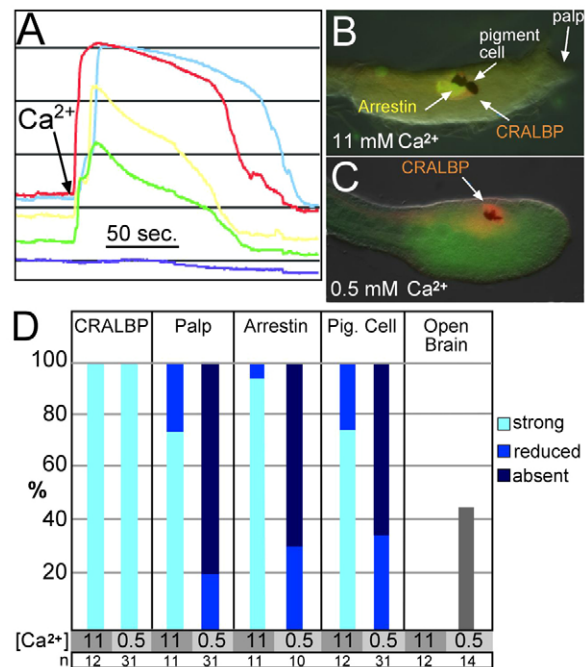

**Fig. 6.  $\text{Ca}^{2+}$  depletion disrupts calcium transients.** (A) No  $\text{Ca}^{2+}$  transients were observed in the neural plate of embryos incubated in low  $\text{Ca}^{2+}$  artificial sea water (ASW). Addition of  $\text{Ca}^{2+}$  to 11 mM (arrow) causes an immediate wave of fluorescence in the cells. The dark blue line indicates a non-expressing cell. (B,C) Representative embryos incubated in ASW containing either 11 mM or 0.5 mM  $\text{Ca}^{2+}$  and immunostained for the indicated markers. (D) Incubation of embryos in low  $\text{Ca}^{2+}$  ASW (0.5 mM  $\text{Ca}^{2+}$ ) for 3 hours (gastrula through initial tailbud stage) resulted in an absence of palp development, caused an open brain phenotype, and greatly reduced the presence of pigment and Arrestin-expressing cells in the sensory vesicle. Control embryos were incubated in normal ASW (11 mM  $\text{Ca}^{2+}$ ).

connexin gene that was then independently expanded in each group. However, the extreme sequence divergence of the tunicate connexin genes may result in clustering due to long-branch attraction. Attempts to correct for long-branch attraction suggest that there might have been at least two connexin genes in the last common ancestor (Cruciani and Mikalsen, 2007).

The temporal expression of *cx-11* in the neural precursor cells correlates precisely with the period of a-lineage induction. Expression above the low baseline level is first detected at the 32-cell stage, persists through gastrulation, and then declines at neurula stage. Moreover, there appears to be a progressive specification of a-lineage fates. Previous work with isolated ascidian blastomeres showed that the palps are induced first, followed by the sensory vesicle, and finally the pigment cells, reflecting a progressive specification of cell fates between the 32-cell and gastrula stages (Nishida, 1991; Wada et al., 1999). This same progression of specification is apparent in the results from staged  $\beta$ GA treatment, with early treatments most profoundly disrupting palps, whereas sustained treatments are required to significantly reduce pigment cells. Previous work in *C. intestinalis* using voltage clamping and dye transfer has described gap junction coupling between cells as early as the 2-cell stage, with a noticeable increase in coupling starting at the 16- to 32-cell stages (Serras et al., 1988; Dale et al., 1991). Moreover, blastomere

isolation and cleavage arrest experiments in *H. roretzi* have demonstrated gap junction coupling between a-lineage and A-lineage cells, which declines during the late neurula to tailbud stages in neurally committed but not epidermally committed a-lineage cells (Saitoe et al., 1996).

We hypothesize that the role of *cx-11* in *C. intestinalis* anterior neural plate development is through mediation of  $\text{Ca}^{2+}$  transients (Fig. 7). We have shown that  $\text{Ca}^{2+}$  transients can be detected in the *C. intestinalis* neural plate as early as late gastrula, and that in homozygous *frm* embryos  $\text{Ca}^{2+}$  transients are essentially eliminated. Moreover, addition of a gap junction inhibitor to late gastrula and neurula stage embryos eliminates  $\text{Ca}^{2+}$  transients while at the same time mimicking the *frm* phenotype. Additionally,  $\text{Ca}^{2+}$  depletion starting at the late gastrula stage eliminated  $\text{Ca}^{2+}$  transients and caused defects similar to those seen in *frm/frm* embryos. In *Xenopus*,  $\text{Ca}^{2+}$  transients have been shown to be an essential feature of neural induction (Moreau et al., 1994; Leclerc et al., 2000; Leclerc et al., 2006; Moreau et al., 2008). Taken together, our data point to a conserved role for  $\text{Ca}^{2+}$  transients in *C. intestinalis* neural induction.

Connexins are known to mediate  $\text{Ca}^{2+}$  waves in mammalian cells (Toyofuku et al., 1998; Lacar et al., 2011; Orellana et al., 2012), although a role in vertebrate neural plate induction has not been demonstrated. Gap junctions appear to function via several mechanisms in  $\text{Ca}^{2+}$  wave propagation. In one mechanism, gap junctions act intercellularly to propagate  $\text{Ca}^{2+}$  waves by allowing the spread of  $\text{Ca}^{2+}$  releasing factors, including  $\text{Ca}^{2+}$  itself (Leybaert et al., 1998; Isakson et al., 2006; Lacar et al., 2011). A second mechanism has been described in the developing mammalian CNS and involves extracellular propagation via ATP released from hemichannels acting via P2 receptors to trigger  $\text{Ca}^{2+}$  waves (Dale, 2008; Orellana et al., 2012). This second mechanism is unlikely to be present in *C. intestinalis* because ascidians appear to lack purinergic receptors (Okamura et al., 2005). Further research will be needed to uncover the source of the  $\text{Ca}^{2+}$  of the transients (intracellular or extracellular) and to identify other essential gene products, such as  $\text{Ca}^{2+}$  channels.

Further investigation will also be needed to place the requirement for *cx-11* and  $\text{Ca}^{2+}$  transients into the context of the well-characterized pathway of a-lineage CNS induction in ascidians (Bertrand et al., 2003; Miya and Nishida, 2003; Meinertzhagen et al., 2004; Imai et al., 2006). Early responses to

induction in the a-lineage include the expression of the transcription factors *otx* and *dmrt1* (Haeussler et al., 2010; Tresser et al., 2010). In the *frm* mutation, *otx* expression is maintained in the a-lineage, whereas the expression of downstream genes such as *six3/6* (Haeussler et al., 2010) is lost following an initial brief expression (Deschet and Smith, 2004). We speculate that *cx-11* is required to maintain a-lineage induction through the mediation of  $\text{Ca}^{2+}$  transients (Fig. 7). Because *cx-11* expression and  $\text{Ca}^{2+}$  transients are observed widely in the neural plate, *cx-11* could function to mediate  $\text{Ca}^{2+}$  transients either within the induced a-lineage (Fig. 7, green arrow 1), between the A-lineage and the a-lineage (Fig. 7, green arrow 2), or both. Because *GCaMP5* is not expressed in the a-lineage of the *frm* mutant, preventing us from assessing the presence or absence of  $\text{Ca}^{2+}$  transients, it remains a possibility that  $\text{Ca}^{2+}$  transients persist in these cells, although  $\beta\text{GA}$  treatment was able to eliminate  $\text{Ca}^{2+}$  transients throughout the neural plate. Results from *Xenopus* demonstrating that  $\text{Ca}^{2+}$  transients are required in neurally induced ectodermal explants (animal caps) indicate that, at least in this species,  $\text{Ca}^{2+}$  signaling within the induced tissue is sufficient (Leclerc et al., 2006). It has been proposed that whereas the A-lineage of the ascidian CNS develops autonomously, a-lineage induction shows similarity to vertebrate neural induction and might reflect a conserved mechanism that predates the split of the vertebrate and tunicate subphyla (Bertrand et al., 2003; Meinertzhagen et al., 2004). Likewise, the requirement for  $\text{Ca}^{2+}$  transients in *Xenopus* neural induction suggests that this mechanism was also present in the common ancestor of the tunicates and vertebrates.

#### Acknowledgements

We thank Takehiro Kusakabe for anti-Arrestin and anti-CRALBP antibodies.

#### Funding

This work was supported by the National Institutes of Health [R01 HD038701 to W.C.S.]; G.J.K. was supported by the Gangneung-Wonju National University Visiting Professors Programs (2011). Deposited in PMC for release after 12 months.

#### Competing interests statement

The authors declare no competing financial interests.

#### Supplementary material

Supplementary material available online at <http://dev.biologists.org/lookup/suppl/doi:10.1242/dev.084681/-DC1>

#### References

- Abascal, F. and Zardoya, R. (2012). Evolutionary analyses of gap junction protein families. *Biochim. Biophys. Acta* (in press).
- Abramoff, M. D., Magalhaes, P. J. and Ram, S. J. (2004). Image processing with ImageJ. *Biophotonics International* **11**, 36-42.
- Akerboom, J., Chen, T. W., Wardill, T. J., Tian, L., Marvin, J. S., Mutlu, S., Calderón, N. C., Esposti, F., Borghuis, B. G., Sun, X. R. et al. (2012). Optimization of a GCaMP calcium indicator for neural activity imaging. *J. Neurosci.* **32**, 13819-13840.
- Bertrand, V., Hudson, C., Caillol, D., Popovici, C. and Lemaire, P. (2003). Neural tissue in ascidian embryos is induced by FGF9/16/20, acting via a combination of maternal GATA and Ets transcription factors. *Cell* **115**, 615-627.
- Bone, Q. (1992). On the locomotion of ascidian tadpole larvae. *J. Mar. Biol. Assoc. UK* **72**, 161-186.
- Bruzzo, R. and Dermietzel, R. (2006). Structure and function of gap junctions in the developing brain. *Cell Tissue Res.* **326**, 239-248.
- Chiba, S., Jiang, D., Satoh, N. and Smith, W. C. (2009). Brachyury null mutant-induced defects in juvenile ascidian endodermal organs. *Development* **136**, 35-39.
- Christiaen, L., Wagner, E., Shi, W. and Levine, M. (2009a). Electroporation of transgenic DNAs in the sea squirt *Ciona*. *Cold Spring Harb. Protoc.* **2009**, pdb prot5345.
- Christiaen, L., Wagner, E., Shi, W. and Levine, M. (2009b). Whole-mount *in situ* hybridization on sea squirt (*Ciona intestinalis*) embryos. *Cold Spring Harb. Protoc.* **2009**, pdb prot5348.

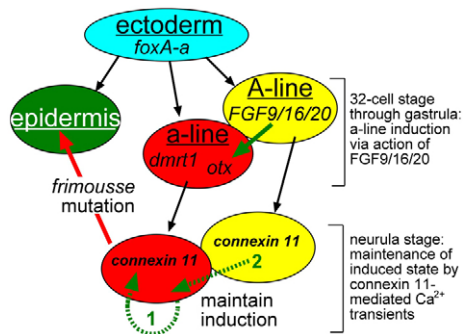

**Fig. 7. Model for *cx-11* function in anterior neural plate induction in *C. intestinalis*.** The a-lineage is induced by FGF9/16/20 from the neighboring A-lineage. At the neurula stage, *cx-11* is expressed throughout the A- and a-lineages, and thus may contribute to signal propagation (most likely  $\text{Ca}^{2+}$  transients) between the A- and a-lineages (green arrow 2) or within the a-lineage (green arrow 1). a-line, a-lineage.



- Cole, A. G. and Meinertzhagen, I. A. (2004). The central nervous system of the ascidian larva: mitotic history of cells forming the neural tube in late embryonic *Ciona intestinalis*. *Dev. Biol.* **271**, 239-262.
- Cruciani, V. and Mikalsen, S. O. (2007). Evolutionary selection pressure and family relationships among connexin genes. *Biol. Chem.* **388**, 253-264.
- Dale, N. (2008). Dynamic ATP signalling and neural development. *J. Physiol.* **586**, 2429-2436.
- Dale, B., Santella, L. and Tosti, E. (1991). Gap-junctional permeability in early and cleavage-arrested ascidian embryos. *Development* **112**, 153-160.
- Darras, S. and Nishida, H. (2001). The BMP/CHORDIN antagonism controls sensory pigment cell specification and differentiation in the ascidian embryo. *Dev. Biol.* **236**, 271-288.
- Delsuc, F., Brinkmann, H., Chourrout, D. and Philippe, H. (2006). Tunicates and not cephalochordates are the closest living relatives of vertebrates. *Nature* **439**, 965-968.
- Deschet, K. and Smith, W. C. (2004). Frimousse – a spontaneous ascidian mutant with anterior ectodermal fate transformation. *Curr. Biol.* **14**, R408-R410.
- Dogan, R. I., Getoor, L., Wilbur, W. J. and Mount, S. M. (2007). SplicePort – an interactive splice-site analysis tool. *Nucleic Acids Res.* **35**, W285-W291.
- Dufour, H. D., Chettouh, Z., Deyts, C., de Rosa, R., Goridis, C., Joly, J. S. and Brunet, J. F. (2006). Precranial origin of cranial motoneurons. *Proc. Natl. Acad. Sci. USA* **103**, 8727-8732.
- Haeussler, M., Jaszczyszyn, Y., Christiaen, L. and Joly, J. S. (2010). A cis-regulatory signature for chordate anterior neuroectodermal genes. *PLoS Genet.* **6**, e1000912.
- Horie, T., Nakagawa, M., Sasakura, Y., Kusakabe, T. G. and Tsuda, M. (2010). Simple motor system of the ascidian larva: neuronal complex comprising putative cholinergic and GABAergic/glycinergic neurons. *Zoolog. Sci.* **27**, 181-190.
- Hotta, K., Mitsuhashi, K., Takahashi, H., Inaba, K., Oka, K., Gojibori, T. and Ikee, K. (2007). A web-based interactive developmental table for the ascidian *Ciona intestinalis*, including 3D real-image embryo reconstructions: I. From fertilized egg to hatching larva. *Dev. Dyn.* **236**, 1790-1805.
- Hudson, C. and Yasuo, H. (2008). Similarity and diversity in mechanisms of muscle fate induction between ascidian species. *Biol. Cell* **100**, 265-277.
- Imai, J. H. and Meinertzhagen, I. A. (2007). Neurons of the ascidian larval nervous system in *Ciona intestinalis*: I. Central nervous system. *J. Comp. Neurol.* **501**, 316-334.
- Imai, K. S., Levine, M., Satoh, N. and Satou, Y. (2006). Regulatory blueprint for a chordate embryo. *Science* **312**, 1183-1187.
- Isakson, B. E., Olsen, C. E. and Boitano, S. (2006). Laminin-332 alters connexin profile, dye coupling and intercellular  $Ca^{2+}$  waves in ciliated tracheal epithelial cells. *Respir. Res.* **7**, 105.
- Jiang, D., Munro, E. M. and Smith, W. C. (2005). Ascidian prickles regulate both mediolateral and anterior-posterior cell polarity of notochord cells. *Curr. Biol.* **15**, 79-85.
- Juszczak, G. R. and Swiergiel, A. H. (2009). Properties of gap junction blockers and their behavioural, cognitive and electrophysiological effects: animal and human studies. *Prog. Neuropsychopharmacol. Biol. Psychiatry* **33**, 181-198.
- Kim, G. J. and Nishida, H. (2001). Role of the FGF and MEK signaling pathway in the ascidian embryo. *Dev. Growth Differ.* **43**, 521-533.
- Lacar, B., Young, S. Z., Platel, J. C. and Bordey, A. (2011). Gap junction-mediated calcium waves define communication networks among murine postnatal neural progenitor cells. *Eur. J. Neurosci.* **34**, 1895-1905.
- Launay, C., Fromentoux, V., Shi, D. L. and Boucrot, J. C. (1996). A truncated FGF receptor blocks neural induction by endogenous *Xenopus* inducers. *Development* **122**, 869-880.
- Leclerc, C., Webb, S. E., Daguzan, C., Moreau, M. and Miller, A. L. (2000). Imaging patterns of calcium transients during neural induction in *Xenopus laevis* embryos. *J. Cell Sci.* **113**, 3519-3529.
- Leclerc, C., Néant, I., Webb, S. E., Miller, A. L. and Moreau, M. (2006). Calcium transients and calcium signalling during early neurogenesis in the amphibian embryo *Xenopus laevis*. *Biochim. Biophys. Acta* **1763**, 1184-1191.
- Lemaire, P., Smith, W. C. and Nishida, H. (2008). Ascidians and the plasticity of the chordate developmental program. *Curr. Biol.* **18**, R620-R631.
- Leybaert, L., Paemeleire, K., Strahonja, A. and Sanderson, M. J. (1998). Inositol-trisphosphate-dependent intercellular calcium signaling in and between astrocytes and endothelial cells. *Glia* **24**, 398-407.
- Meinertzhagen, I. A., Lemaire, P. and Okamura, Y. (2004). The neurobiology of the ascidian tadpole larva: recent developments in an ancient chordate. *Annu. Rev. Neurosci.* **27**, 453-485.
- Mese, G., Richard, G. and White, T. W. (2007). Gap junctions: basic structure and function. *J. Invest. Dermatol.* **127**, 2516-2524.
- Minokawa, T., Yagi, K., Makabe, K. W. and Nishida, H. (2001). Binary specification of nerve cord and notochord cell fates in ascidian embryos. *Development* **128**, 2007-2017.
- Miya, T. and Nishida, H. (2003). An Ets transcription factor, HrEts, is target of FGF signaling and involved in induction of notochord, mesenchyme, and brain in ascidian embryos. *Dev. Biol.* **261**, 25-38.
- Moreau, M., Leclerc, C., Gualandris-Parisot, L. and Duprat, A. M. (1994). Increased internal  $Ca^{2+}$  mediates neural induction in the amphibian embryo. *Proc. Natl. Acad. Sci. USA* **91**, 12639-12643.
- Moreau, M., Néant, I., Webb, S. E., Miller, A. L. and Leclerc, C. (2008). Calcium signalling during neural induction in *Xenopus laevis* embryos. *Philos. Trans. R. Soc. Lond. B Biol. Sci.* **363**, 1371-1375.
- Nishida, H. (1987). Cell lineage analysis in ascidian embryos by intracellular injection of a tracer enzyme. III. Up to the tissue restricted stage. *Dev. Biol.* **121**, 526-541.
- Nishida, H. (1991). Induction of brain and sensory pigment cells in the ascidian embryo analyzed by experiments with isolated blastomeres. *Development* **112**, 389-395.
- Okamura, Y., Nishino, A., Murata, Y., Nakajo, K., Iwasaki, H., Ohtsuka, Y., Tanaka-Kunishima, M., Takahashi, N., Hara, Y., Yoshida, T. et al. (2005). Comprehensive analysis of the ascidian genome reveals novel insights into the molecular evolution of ion channel genes. *Physiol. Genomics* **22**, 269-282.
- Orellana, J. A., Sánchez, H. A., Schalper, K. A., Figueroa, V. and Sáez, J. C. (2012). Regulation of intercellular calcium signaling through calcium interactions with connexin-based channels. *Adv. Exp. Med. Biol.* **740**, 777-794.
- Roure, A., Rothbächer, U., Robin, F., Kalmay, E., Ferone, G., Lamy, C., Missero, C., Mueller, F. and Lemaire, P. (2007). A multicassette Gateway vector set for high throughput and comparative analyses in *Ciona* and vertebrate embryos. *PLoS ONE* **2**, e916.
- Saitoe, M., Inazawa, T. and Takahashi, K. (1996). Neuronal expression in cleavage-arrested ascidian blastomeres requires gap junctional uncoupling from neighbouring cells. *J. Physiol.* **491**, 825-842.
- Sasai, Y., Lu, B., Piccolo, S. and De Robertis, E. M. (1996). Endoderm induction by the organizer-secreted factors chordin and noggin in *Xenopus* animal caps. *EMBO J.* **15**, 4547-4555.
- Serras, F., Baud, C., Moreau, M., Guerrier, P. and Van den Biggelaar, J. A. M. (1988). Intercellular communication in the early embryo of the ascidian *Ciona intestinalis*. *Development* **102**, 55-63.
- Shestopalov, V. I. and Panchin, Y. (2008). Pannexins and gap junction protein diversity. *Cell. Mol. Life Sci.* **65**, 376-394.
- Toyofuku, T., Yabuki, M., Otsu, K., Kuzuya, T., Hori, M. and Tada, M. (1998). Intercellular calcium signaling via gap junction in connexin-43-transfected cells. *J. Biol. Chem.* **273**, 1519-1528.
- Tresser, J., Chiba, S., Veeman, M., El-Nachef, D., Newman-Smith, E., Horie, T., Tsuda, M. and Smith, W. C. (2010). doublesex/mab3 related-1 (dmrt1) is essential for development of anterior neural plate derivatives in *Ciona*. *Development* **137**, 2197-2203.
- Tsuda, M., Kusakabe, T., Iwamoto, H., Horie, T., Nakashima, Y., Nakagawa, M. and Okunou, K. (2003). Origin of the vertebrate visual cycle: II. Visual cycle proteins are localized in whole brain including photoreceptor cells of a primitive chordate. *Vision Res.* **43**, 3045-3053.
- Veeman, M. T., Nakatani, Y., Hendrickson, C., Ericson, V., Lin, C. and Smith, W. C. (2008). Chongmague reveals an essential role for laminin-mediated boundary formation in chordate convergence and extension movements. *Development* **135**, 33-41.
- Veeman, M. T., Newman-Smith, E., El-Nachef, D. and Smith, W. C. (2010). The ascidian mouth opening is derived from the anterior neuropore: reassessing the mouth/neural tube relationship in chordate evolution. *Dev. Biol.* **344**, 138-149.
- Veeman, M. T., Chiba, S. and Smith, W. C. (2011). *Ciona* genetics. *Methods Mol. Biol.* **770**, 401-422.
- Wada, S., Katsuyama, Y. and Saiga, H. (1999). Anteroposterior patterning of the epidermis by inductive influences from the vegetal hemisphere cells in the ascidian embryo. *Development* **126**, 4955-4963.
- Wada, S., Sudou, N. and Saiga, H. (2004). Roles of *otx* gene, in the differentiation of the brain (sensory vesicle) and anterior trunk epidermis in the larval development of *Halocynthia roretzi*. *Mech. Dev.* **121**, 463-474.
- Wang Z. and Burge, C. B. (2008). Splicing regulation: from a parts list of regulatory elements to an integrated splicing code. *RNA* **14**, 802-813.
- Yagi, K. and Makabe, K. W. (2001). Isolation of an early neural marker gene abundantly expressed in the nervous system of the ascidian, *Halocynthia roretzi*. *Dev. Genes Evol.* **211**, 49-53.
- Yamada, L., Shoguchi, E., Wada, S., Kobayashi, K., Mochizuki, Y., Satou, Y. and Satoh, N. (2003). Morpholino-based gene knockdown screen of novel genes with developmental function in *Ciona intestinalis*. *Development* **130**, 6485-6495.
